# Supplementary material
Source: PubMed Central journal article supplement (PMC3256613)
Supplement: supp_194.1.28_SuppFigures.pdf [file supp_194.1.28_SuppFigures.pdf]

## Supplementary materials.

### A Levels of DnaA in swarmer cells

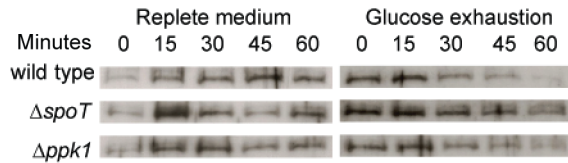

### B Loading controls of CtrA western blots

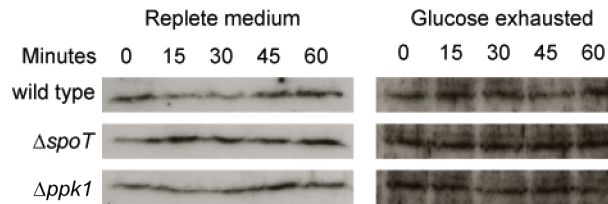

### C Stability of point mutants

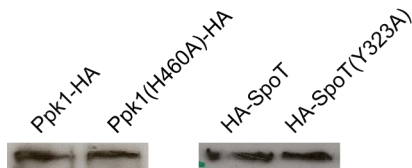

**Fig. S1. DnaA western blots, CtrA western blot loading controls, stability of point mutants.** A) Levels of DnaA in swarmer cells. (left) Blots from a population of synchronized swarmer cells in nutrient replete (M2G) medium. (right) Blots from a population of synchronized swarmer cells in glucose exhaustion (using M2G<sub>1/10</sub> as described in Materials and Methods). B) Loading control bands for representative  $\alpha$ -CtrA blots shown in Fig. 4 in replete medium and glucose exhaustion. The blots for the replete medium samples were stripped after probing for CtrA and then re-probed with the  $\alpha$ -FixJ antibody. The blots for the glucose exhaustion sample were cut in half and the bottom half was probed in  $\alpha$ -CtrA (Fig. 4B) and the top half was probed with the  $\alpha$ -PhyR antibody, for which a non-specific band is shown here. C) Western blots of equal volumes of cell lysate from the *ppk1*-HA and *ppk1*(H460A)-HA strains and the HA-*spoT* and HA-*spoT*(Y323A) strains, probed with  $\alpha$ -HA antibodies.

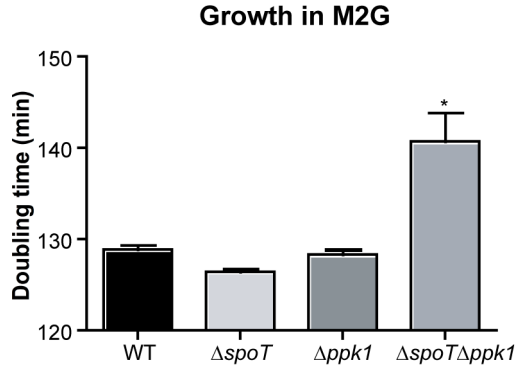

**Fig. S2. Growth in M2G.** Doubling times of wild-type,  $\Delta spoT$ ,  $\Delta ppk1$ , and  $\Delta spoT\Delta ppk1$  strains in M2G minimal medium. N=4, error bars represent standard error of the mean. Mutant growth rates compared to wild-type control (one-way ANOVA; Dunnett's post test, \*p<0.01).

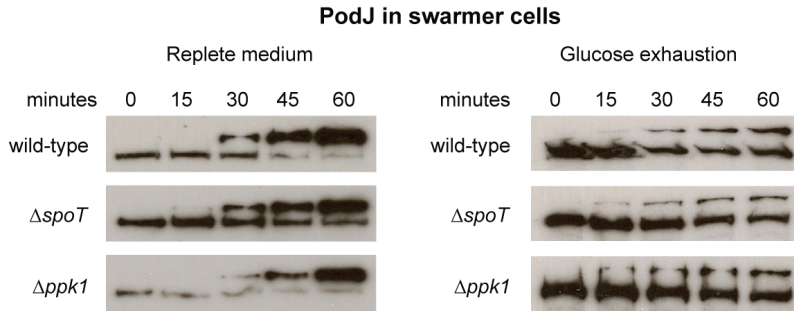

**Fig. S3. PodJ levels in swarmer cells.** (left) Blots from a synchronized population of swarmer cells in nutrient replete (M2G) medium probed with  $\alpha$ -PodJ antibodies that hybridize to the short and long forms of PodJ. On the right are blots from a synchronized population of swarmer cells during glucose exhaustion (using M2G<sub>1/10</sub> as described in Materials and Methods) probed with the same antibodies.
